# Supplementary material for: New remarkable Late Jurassic teleosts from southern Germany: Ascalaboidae n. fam., its content, morphology, and phylogenetic relationships
Source: Copernicus journal article supplement (doi:10.5194/fr-19-31-2016), 2016-01-18
Supplement: Supplementary file 1 [file fr-19-31-2016-supplement.zip]

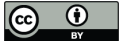

*Supplement of*

**New remarkable Late Jurassic teleosts from southern Germany: Ascalaboidae n. fam., its content, morphology, and phylogenetic relationships**

**G. Arratia**

*Correspondence to:* G. Arratia ([garratia@ku.edu](mailto:garratia@ku.edu))

- [fr-19-31-2016-supplement-title-page.pdf](#)
- [Arratia\\_Supplement 1\\_Final\\_corrected.doc](#)
- [Arratia\\_Supplement 2\\_Final\\_corrected.doc](#)

The copyright of individual parts of the supplement might differ from the CC-BY 3.0 licence.
